# Supplementary material for: Sarcopenia phenotype and impaired muscle function in male mice with fast-twitch muscle-specific knockout of the androgen receptor
Source: PubMed Central journal article supplement — Proc Natl Acad Sci U S A. 2023 Jan 20;120(4):e2218032120. doi: 10.1073/pnas.2218032120 (PMC9942915; doi:10.1073/pnas.2218032120), 2023-01-20
Supplement: pnas.2218032120.sapp.pdf [file pnas.2218032120.sapp.pdf]

## **Supporting Information for** Sarcopenia phenotype and impaired muscle function in male mice with fast-twitch muscle-specific knockout of the androgen receptor

Tatsuya Hosoi, Mitsutaka Yakabe, Hiroko Sasakawa, Takayoshi Sasako, Kohjiro Ueki, Shigeaki Kato, Suzumi M Tokuoka, Yoshiya Oda, Masahiro Abe, Toshio Matsumoto, Masahiro Akishita, Sumito Ogawa

Sumito Ogawa  
Email: suogawa@m.u-tokyo.ac.jp

### **This PDF file includes:**

Figures S1 to S5  
Tables S1 to S2  
Legends for Dataset S1

### **Other supporting materials for this manuscript include the following:**

Dataset S1

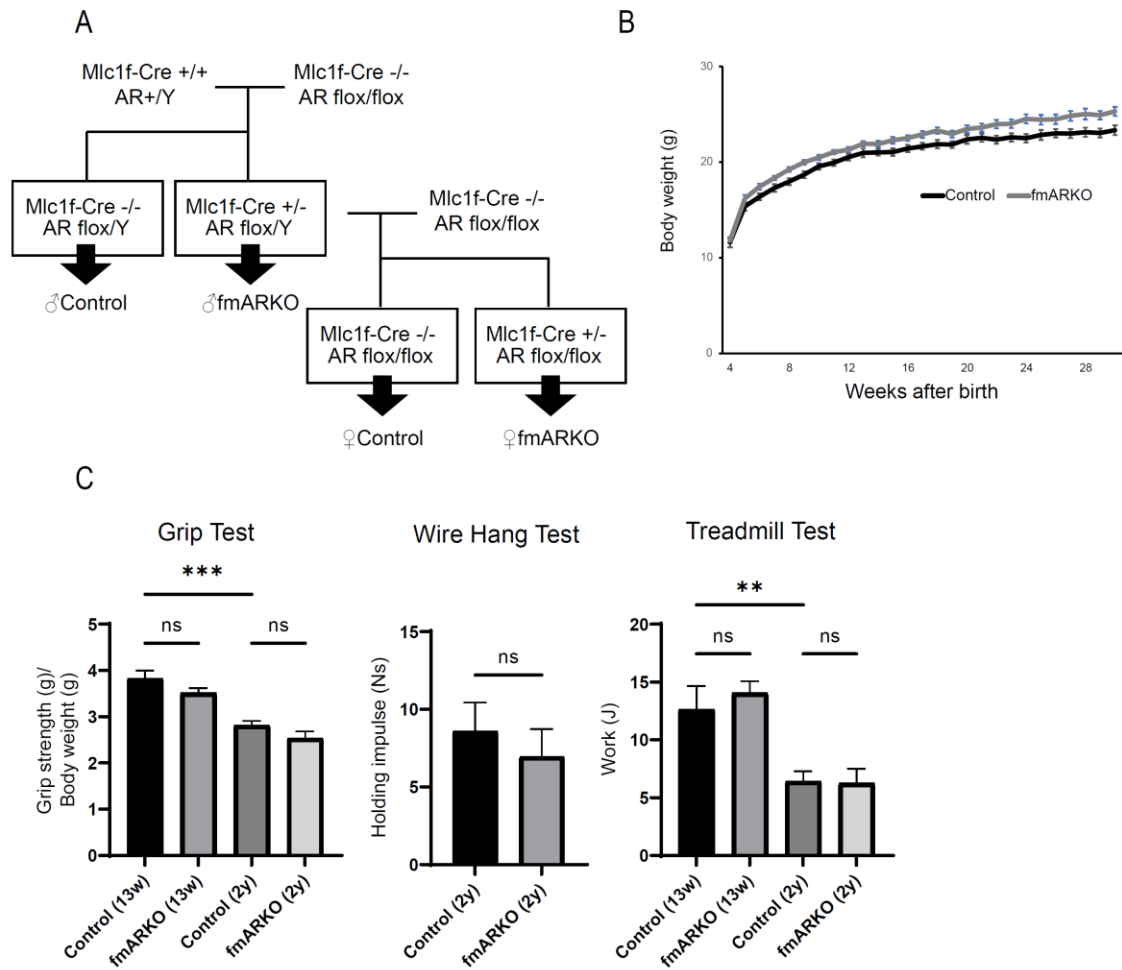

**Fig. S1.** Phenotypes observed in female fmARKO mice.

(A) The strategy used to generate Mlc1f-Cre +/- AR flox/flox mice (referred to as female fmARKO mice).

(B) Growth curves of control and fmARKO females (n=13-14/group).

(C) The results of grip test, wire hang test and treadmill test were compared between control and fmARKO females at 13-wk-old or 2-yr-old. (n=5-13/group).

Error bars indicate SEM; \*\* $p < 0.01$ , \*\*\* $p < 0.001$

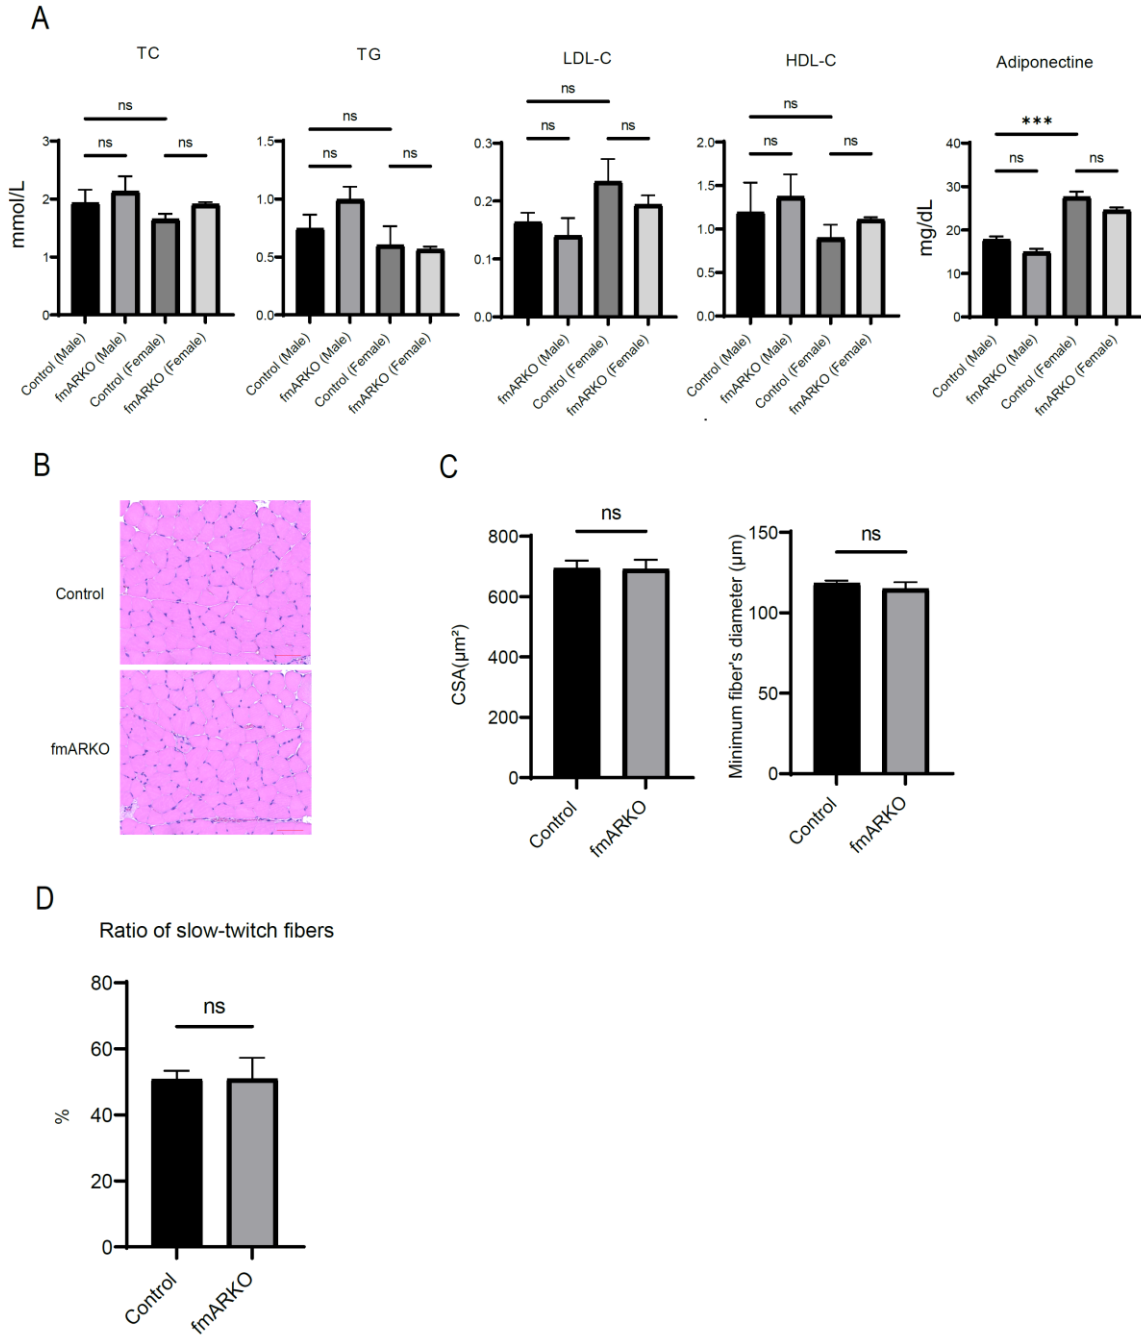

**Fig. S2.** Histological analysis of skeletal muscles in female fmARKO mice.

(A) Serum lipid levels; total cholesterol (TC), triglycerides (TG), low-density lipoprotein cholesterol (LDL-C), high-density lipoprotein cholesterol (HDL-C), and adiponectin showed no difference between control and fmARKO mice. (n=3/group)

(B, C) Histological analysis of H&E-stained soleus muscles of 13-week-old control and fmARKO female mice (scale bar, 50  $\mu$ m). Mean fiber cross-sectional area and minimum fiber's diameter are shown (n=3/group).

(D) The mean ratios of slow-twitch fibers in control and fmARKO females (n=3/group).

Error bars indicate SEM; \*\*\* $p < 0.001$

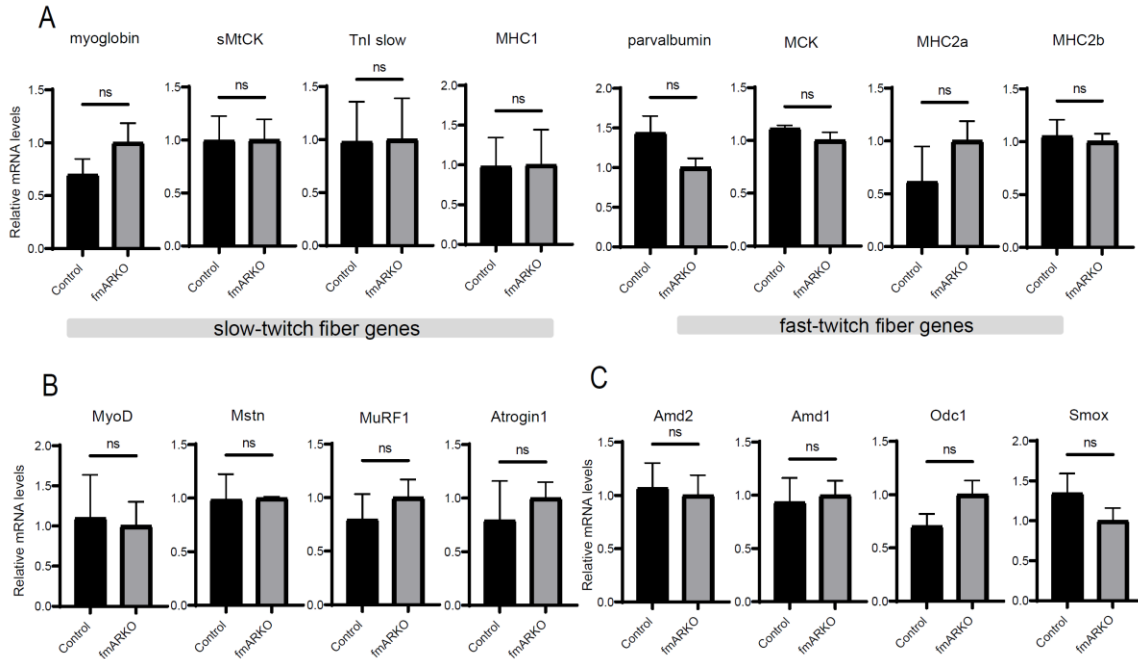

**Fig. S3.** The gene expression differences observed in male fmARKO mice were not observed in female fmARKO mice.

(A-C) Real-time PCR was used to measure gene expression of (A) fiber type-specific transcripts, (B) muscle mass-related transcripts, and (C) polyamine biosynthesis-related transcripts (n=3/group).

Error bars indicate SEM

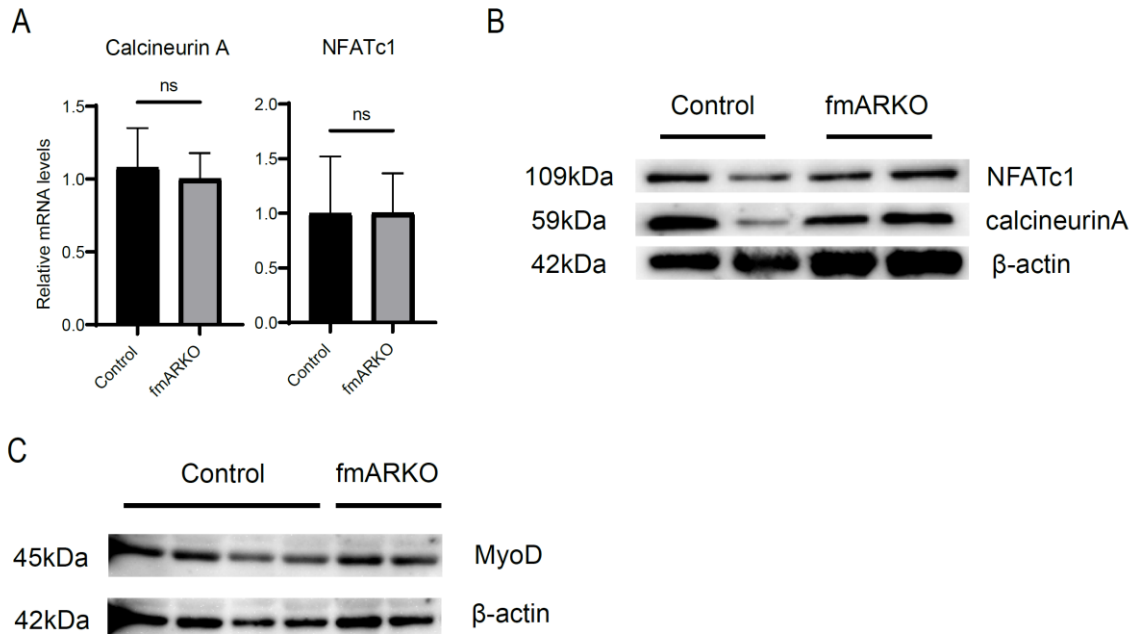

**Fig. S4.** The shift in muscle fiber type observed in fmARKO mice was independent of the Calcineurin A/nuclear factor of activated T cells cytoplasmic 1 pathway in the translational level.

(A) Real-time PCR showed no change in *CnA* and *NFATc1* gene expression in the gastrocnemius muscles of mice after androgen receptor knockout (n=6/group).

(B) The protein levels of *CnA* and *NFATc1* in control and fmARKO mice were measured (n=2/group).

(C) The protein levels of *MyoD* in control and fmARKO mice were measured (n=2-4/group).

Error bars indicate SEM

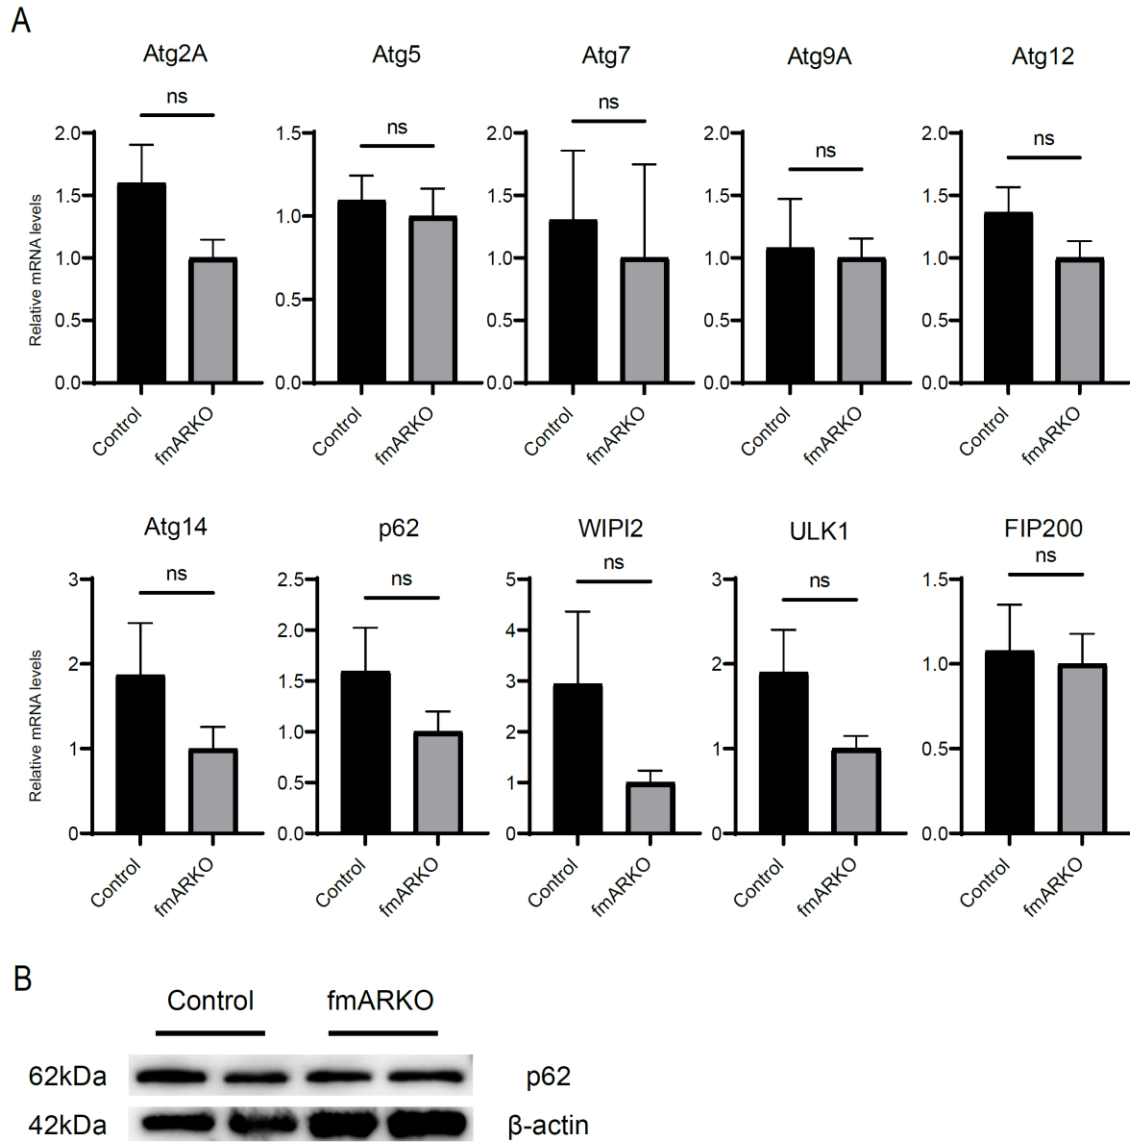

**Fig. S5.** Autophagy in fmARKO mice.

(A) Real-time PCR was used to measure the gene expression levels of autophagy-related genes (n=6/group).

(B) The protein levels of *p62* in control and fmARKO mice (n=2/group).

Error bars indicate SEM

**Table S1.** Total body weight and hind limb muscle, and heart mass (mg) normalized by body weight (g) in female mice

|                       | 13wk          |              | 2yr           |              |
|-----------------------|---------------|--------------|---------------|--------------|
|                       | Control (n=5) | fmARKO (n=5) | Control (n=7) | fmARKO (n=9) |
| Total body weight (g) | 21.2 ± 1.0    | 21.7 ± 0.6   | 27.7 ± 1.5    | 29.8 ± 1.0   |
| Gastrocnemius (mg/g)  | 5.5 ± 0.04    | 5.4 ± 0.1    | 4.1 ± 0.2     | 3.9 ± 0.2    |
| Soleus (mg/g)         | 0.35 ± 0.02   | 0.37 ± 0.02  | 0.24 ± 0.01   | 0.24 ± 0.01  |
| EDL (mg/g)            | 0.43 ± 0.01   | 0.45 ± 0.02  | 0.30 ± 0.01   | 0.30 ± 0.01  |
| Tibialis (mg/g)       | 2.9 ± 0.2     | 2.9 ± 0.2    | 1.6 ± 0.04    | 1.6 ± 0.1    |
| Heart (mg/g)          | 5.4 ± 0.2     | 5.5 ± 0.2    | 5.7 ± 0.3     | 5.6 ± 0.3    |

Data are expressed ± SEM



**Table S2.** List of primers used in this study

| Genes        | Forward primer (5'-3')       | Reverse primer (5'-3')          |
|--------------|------------------------------|---------------------------------|
| 36B4         | G TTCAGCATG TTCAGCAGTGTG     | AATCTCCAGAGGCACCATTGA           |
| AR           | GGACAGTACCAGGGACCATG         | TCCGTAGTGACAGCCAGAAG            |
| myoglobin    | GCACAAGATCCCGGTCAAGTACCTGGAG | CTGACGAAGGCCACTTTGCACCTCTG      |
| Tnl slow     | TGCCGGAAGTTGAGAGGAAATCCAAGAT | CCAGCACCTTCAGCTCAGGTCCTTGAT     |
| sMtCK        | GATGGCCAGTGCCTTCTCAAAGTTGCTA | TGTCCACTCCAGTTTGGATGCACTGGTC    |
| MHC1         | GCCAACTATGCTGGAGCTGATGCCC    | GGTGCCTGGAGCGCAAGTTTGTCCATAAG   |
| parvalbumin  | GCAGGATGTCGATGACAGACGTGCTCAG | CCACTTACGTTTCAGCCACCAGAGTGGA    |
| MCK          | GATGTCATCCAGACTGGGGTGGACAACC | TGAACTCGCCCGTCAGGCTGTTGAG       |
| MHC2a        | TGACAACTCGTCTCGCTTTG         | AAGTGACCCGGGACTTCTCT            |
| MHC2b        | CGAAGGCGGAGCTACGGTCA         | CGGCAGCCACTTGTAGGGGT            |
| MyoD         | AGCACTACAGTGGCGACTCAG        | AGGCGGTGTCGTAGCCATTG            |
| Myostatin    | CTGTAACCTTCCCAGGACCA         | TCTTTTGGGTGCGATAATCC            |
| MuRF1        | TAAGTGCATCTCCATGCTGGTG       | TGGCGTAGAGGGTGTCAAAGTT          |
| Atrogen1     | GTCGCAGCCAAGAAGAGAAAGA       | TGCTATCAGCTCCAACAGCCTT          |
| Amd1         | GGATCTGGGGATCTTCGTACC        | CTGCTTGTGAGTCTTTGTCACAC         |
| Amd2         | TCACGTTCAACTTTGCTCAGC        | AGCGAACAACCAACAACCACAG          |
| Odc1         | GCAGTCAACATCATTGCCAA         | TGTTCAATTTGACTCATCTTCATCGT      |
| Smox         | CACAGAGAGCTCCAAGACAGC        | GGGCACTTGGATGGTAAAAG            |
| CnA (PPP3CA) | CAACTCGCTACCTCTTC            | CCATACAGGCGTCATAAA              |
| NFATc1       | CCTTCGGAAGGGTGCCTTTT         | AGGCGTGGGGCCTCAGCAGG            |
| Atg2A        | CTATCTGTTCCAGGTGAACGGAGTGG   | CTGGATGCAGCTGTGTCACGATGG        |
| Atg5         | GACAAAGATGTGCTTCGAGATGTG     | GTAGCTCAGATGCTCGCTCAG           |
| Atg7         | CCTGCACAACCAACACAC           | CACCTGACTTTATGGCTTCCC           |
| Atg9A        | CGGAATTCATGGCACAGTTTGACTGTA  | GGGAAGCTTCTATACCTTGTGCACTTG     |
| Atg12        | AATCCGGAAAGCAGCTGTGTTG       | TTGCAGTGCAGTCTAGTTGTGG          |
| Atg14        | GAGGGCCTTTACGTGGCTG          | AATAGACGAAATCACCAGCTCTG         |
| p62          | CCCAGTGTCTTGGCATTCTT         | AGGGAAAGCAGAGGAAGCTC            |
| WIPI2        | CCAGGATAACACGTCCCTAGCTGTTGG  | CTCTCCACAATGCAGACATCTTCAGTGTGAG |
| ULK1         | AAGTTCGAGTTCTCTCGCAAG        | ACCTCCAGGTCGTGCTTCT             |
| FIP200       | GGAATCTCTGGTCAGGAAGTGC       | GTCCAAGGCATACAGCCGATCT          |

**Dataset S1 (separate file).**

(Tab1) GO Term extracted (down in fmARKO mice)

(Tab2) List of down-regulated genes in fmARKO mice

(Tab3) GO Term extracted (up in fmARKO mice)

(Tab4) List of up-regulated genes in fmARKO mice
